# Supplementary material
Source: Springer Nature journal article supplement (https://www.springermedizin.de/resource/supplementary/12936_2011_2104_MOESM7_ESM.pdf/9543370)

## A) Mongola

Model 1

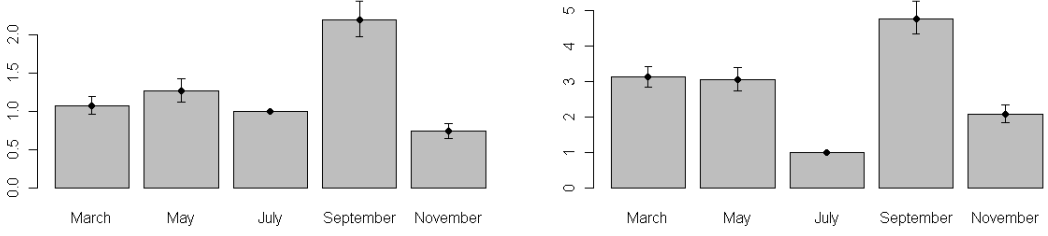

Model 2

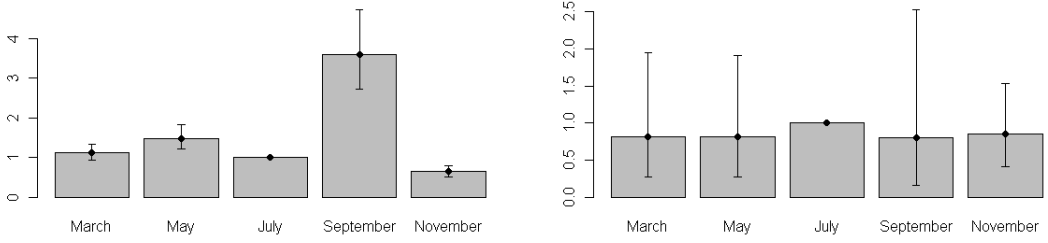

## B) Arena Blanca

Model 1

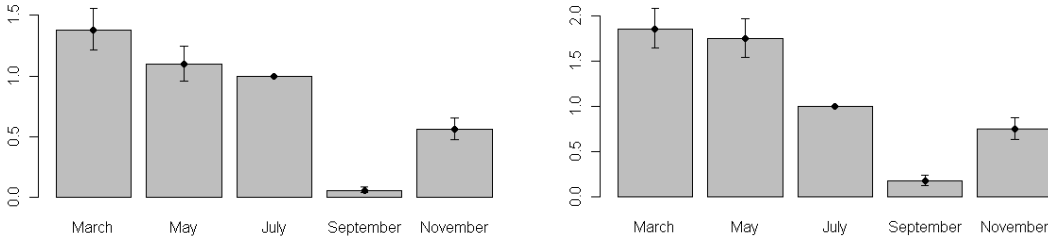

Model 2

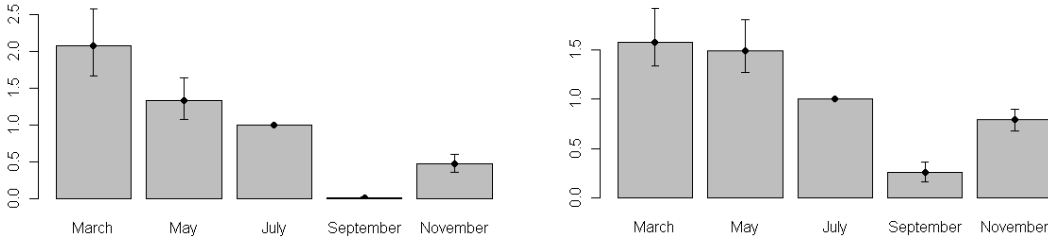

## C) Riaba

Model 1

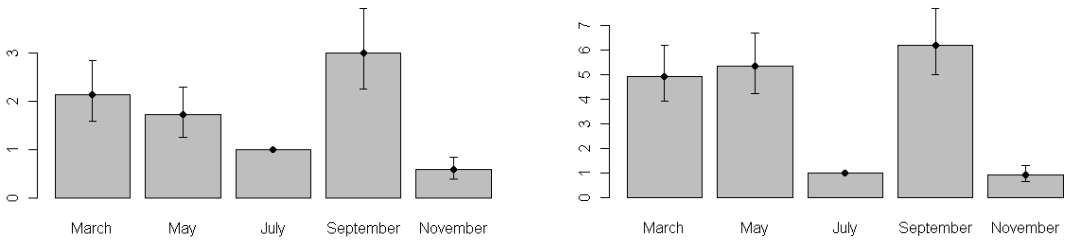

Model 2

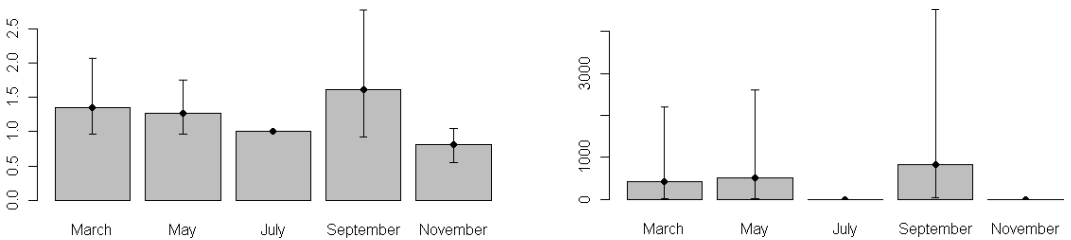

Indoors

Outdoors

Supplement: MOESM7 [file 9543370]
